# Supplementary material for: TPGS-based and S-thanatin functionalized nanorods for overcoming drug resistance in Klebsiella pneumonia
Source: PubMed Central journal article supplement (PMC9243133; doi:10.1038/s41467-022-31500-3), 2022-06-29
Supplement: 41467_2022_31500_MOESM1_ESM.pdf [file 41467_2022_31500_MOESM1_ESM.pdf]

## Supplementary Information

### TPGS-based and S-thanatin functionalized nanorods for overcoming drug resistance in *Klebsiella pneumonia*

Xiaojuan Wang<sup>1</sup>, Xiaoling Xu<sup>2</sup>, Shaojun Zhang<sup>1</sup>, Na Chen<sup>1</sup>, Yunfeng Sun<sup>2</sup>, Kuifen Ma<sup>1</sup>, Dongsheng Hong<sup>1</sup>, Lu Li<sup>1</sup>, Yongzhong Du<sup>2\*</sup>, Xiaoyang Lu<sup>1\*</sup>, Saiping Jiang<sup>1\*</sup>

<sup>1</sup> Department of Clinical Pharmacy, The First Affiliated Hospital, School of Medicine, Zhejiang University, 79 Qingchun Road, Hangzhou 310003, China

<sup>2</sup> Institute of Pharmaceutics, College of Pharmaceutical Sciences, Zhejiang University, 866 Yu-Hang-Tang Road, Hangzhou, 310058, China

#### Correspondence:

Saiping Jiang, [E-mail: j5145@zju.edu.cn](mailto:j5145@zju.edu.cn)

Xiaoyang Lu, [E-mail: luxiaoyang@zju.edu.cn](mailto:luxiaoyang@zju.edu.cn)

Yongzhong Du, [E-mail: duyongzhong@zju.edu.cn](mailto:duyongzhong@zju.edu.cn)

| <b>Content</b>                                                                                                                         | <b>Page</b> |
|----------------------------------------------------------------------------------------------------------------------------------------|-------------|
| <b>Supplementary Fig. 1</b> The inhibitory effect of TPGS on efflux pumps.                                                             | <b>S3</b>   |
| <b>Supplementary Fig. 2</b> Fluorescence images of EA.hy926 cells after incubation with NT-TPGS/Cap and Ts-TPGS/Cap nanorods.          | <b>S4</b>   |
| <b>Supplementary Fig. 3</b> The quantitative analysis of bacterial counts in the BALF of KPN-infected and TRKP-infected pneumonia mice | <b>S5</b>   |
| <b>Supplementary Table 1.</b> FIC indices against KPN and TRKP.                                                                        | <b>S6</b>   |
| <b>Supplementary Table 2.</b> Primer sequences for efflux pump genes                                                                   | <b>S6</b>   |

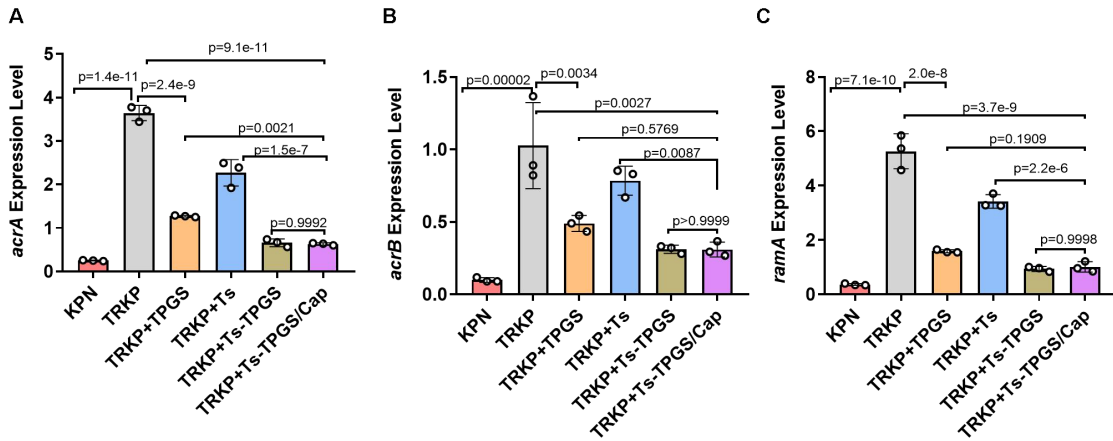

**Supplementary Fig.1** The inhibitory effect of TPGS on efflux pumps. The expression levels of (A) *acrA*, (B) *acrB* and (C) *ramA* of TPGS, Ts, Ts-TPGS and Ts-TPGS/Cap nanorods treated TRKP by RT-PCR method. KPN and TRKP without any treatment were used as control. Ts: S-thanatin peptide; TPGS: tocopheryl polyethylene glycol succinate; Ts-TPGS/Cap: Ts-TPGS functionalized calcium phosphate nanorods; KPN: *Klebsiella pneumonia*; TRKP: tigecycline-resistant *Klebsiella pneumonia*. Data are presented as the mean  $\pm$  SD (n=3 independent experiments). One-way analysis of variance (ANOVA) with post hoc Tukey tests were performed in A, B and C.

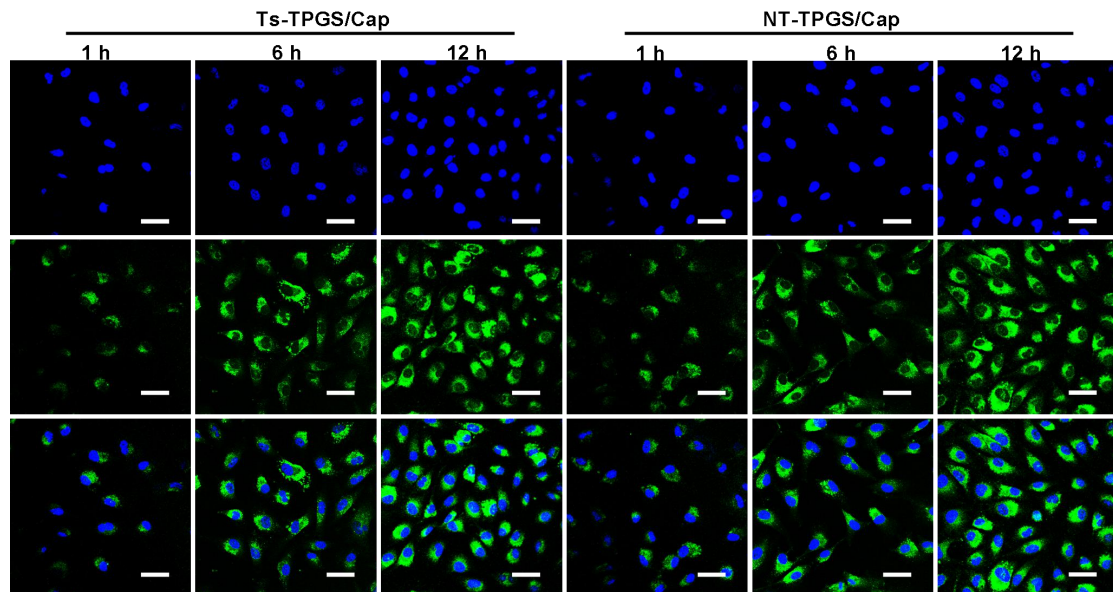

1  
2  
3  
4  
5  
6  
7  
8  
9  
10  
11

**Supplementary Fig.2** Fluorescence images of EA.hy926 cells after incubation with NT-TPGS/Cap and Ts-TPGS/Cap nanorods. The cells were labeled with DAPI (blue), and the green fluorescence signal indicated the nanorods. Scale bar = 50  $\mu\text{m}$ . Ts-TPGS/Cap: Ts-TPGS functionalized calcium phosphate nanorods; NT-TPGS/Cap: non-targeting peptide-TPGS functionalized calcium phosphate nanorods. The experiments were repeated independently for three times with similar results.

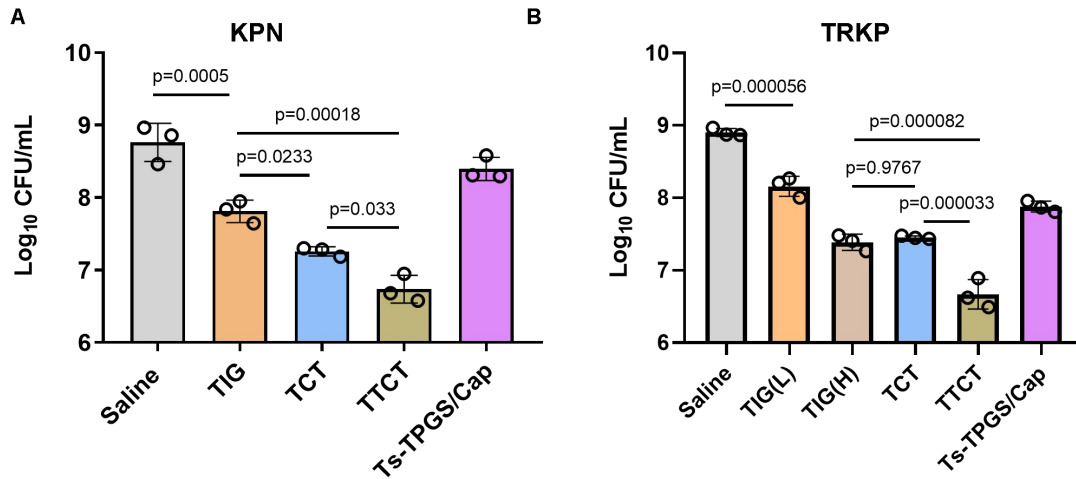

12

13 **Supplementary Fig.3** The quantitative analysis of bacterial counts in the BALF of  
 14 KPN-infected (A) and TRKP-infected pneumonia mice after 48 h receiving various  
 15 treatments. TIG: free tigecycline; TIG(L): low dose of tigecycline (15 mg/kg); TIG  
 16 (H): high dose of tigecycline (45 mg/kg); TCT: tigecycline loaded TPGS/Cap  
 17 nanorods; TTCT: tigecycline-loaded Ts-TPGS/Cap nanorods; KPN: *Klebsiella*  
 18 *pneumonia*; TRKP: tigecycline-resistant *Klebsiella pneumonia*; BALF:  
 19 bronchoalveolar lavage fluid. Data are presented as the mean  $\pm$  SD (n = 3 mice).  
 20 One-way analysis of variance (ANOVA) with post hoc Tukey tests were performed  
 21 in A and B.

22

23

**Supplementary Table 1. FIC indices against KPN and TRKP**

| Microorganisms | Combination | MIC (ug/mL) |          | FICI  | Interpretation |
|----------------|-------------|-------------|----------|-------|----------------|
|                |             | Individual  | Combined |       |                |
| TRKP           | TIG         | 4           | 1        | 0.375 | synergistic    |
|                | Ts          | 16          | 2        |       |                |
| KPN            | TIG         | 1           | 0.5      | 0.75  | additive       |
|                | Ts          | 16          | 4        |       |                |

**Supplementary Table 2. Primer sequences for efflux pump genes**

| Primer name        | Primer Sequence        |
|--------------------|------------------------|
| <i>acrA</i> -F     | ATGTGACGATAAACCGGCTC   |
| <i>acrA</i> -R     | CTGGCAGTTCGGTGGTTATT   |
| <i>acrB</i> -F     | CGATAACCTGATGTACATGTCC |
| <i>acrB</i> -R     | CCGACAACCATCAGGAAGCT   |
| <i>ramA</i> -F     | GCATCAACCGCTGCGTATT    |
| <i>ramA</i> -R     | GGGTAAAGGTCTGTTGCGAAT  |
| <i>16s-rRNA</i> -F | CAGCTCGTGTCGTGAGATGT   |
| <i>16s-rRNA</i> -R | CGTAAGGGCCATGATGACTT   |
